# Supplementary material
Source: MDPI journal article supplement (https://www.mdpi.com/2304-6740/11/9/353)
Supplement: s1 [file s1]

Supplementary Materials for

**Crystal Structures of DNA Intercalating Agents  
Dipyrido[3,2-f:2',3'-h]quinoxaline (dpq),  
(Benzo[*i*]dipyrido[3,2-a:2',3'-c]phenazine (dppn), and  
[Ir(ppy)<sub>2</sub>(dppn)][PF<sub>6</sub>] (Where Hppy = 2-Phenylpyridine)**

Page

|                                                                                                                            |           |
|----------------------------------------------------------------------------------------------------------------------------|-----------|
| <b>Figure S1:</b> <sup>1</sup> H NMR of dipyrido[3,2-f:2',3'-h]quinoxaline (dpq) in CDCl <sub>3</sub>                      | <b>S2</b> |
| <b>Figure S2:</b> <sup>1</sup> H NMR of benzo[ <i>i</i> ]dipyrido[3,2-a:2',3'-c]phenazine (dppn) in CDCl <sub>3</sub>      | <b>S2</b> |
| <b>Figure S3:</b> <sup>1</sup> H NMR [Ir(ppy) <sub>2</sub> (dppn)][PF <sub>6</sub> ] in (CD <sub>3</sub> ) <sub>2</sub> CO | <b>S3</b> |

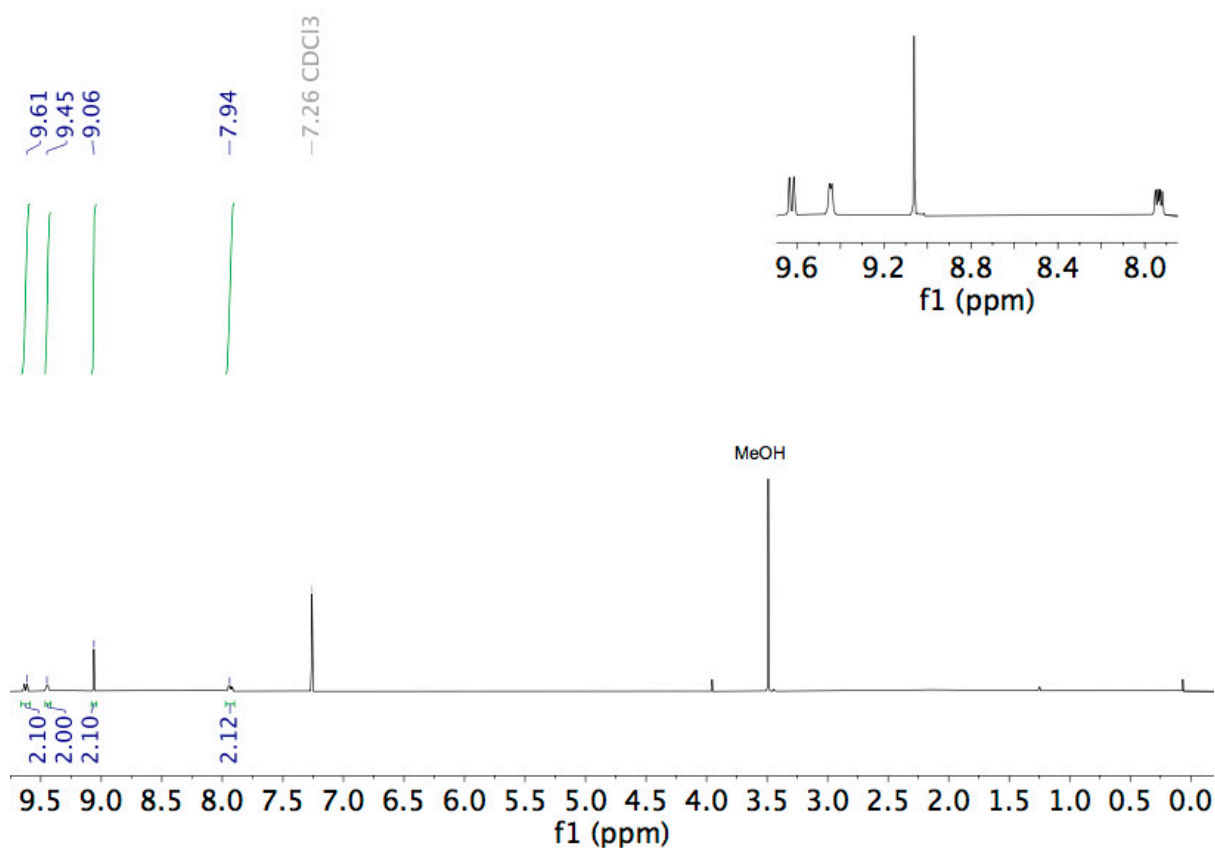

**Figure S1.** <sup>1</sup>H NMR of dipyrido[3,2-f:2',3'-h]quinoxaline (dpq) in CDCl<sub>3</sub>.

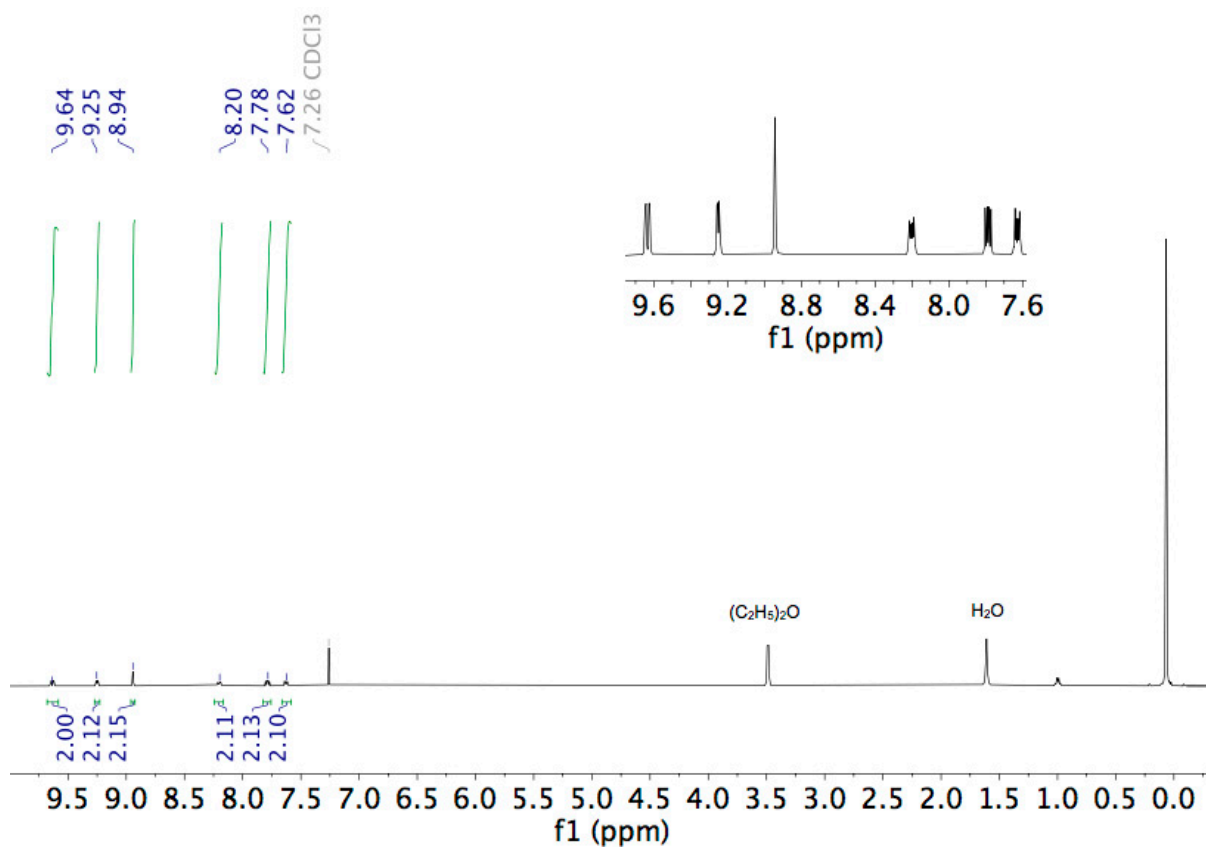

**Figure S2.** <sup>1</sup>H NMR of benzo[*i*]dipyrido[3,2-a:2',3'-c]phenazine (dppn) in CDCl<sub>3</sub>.

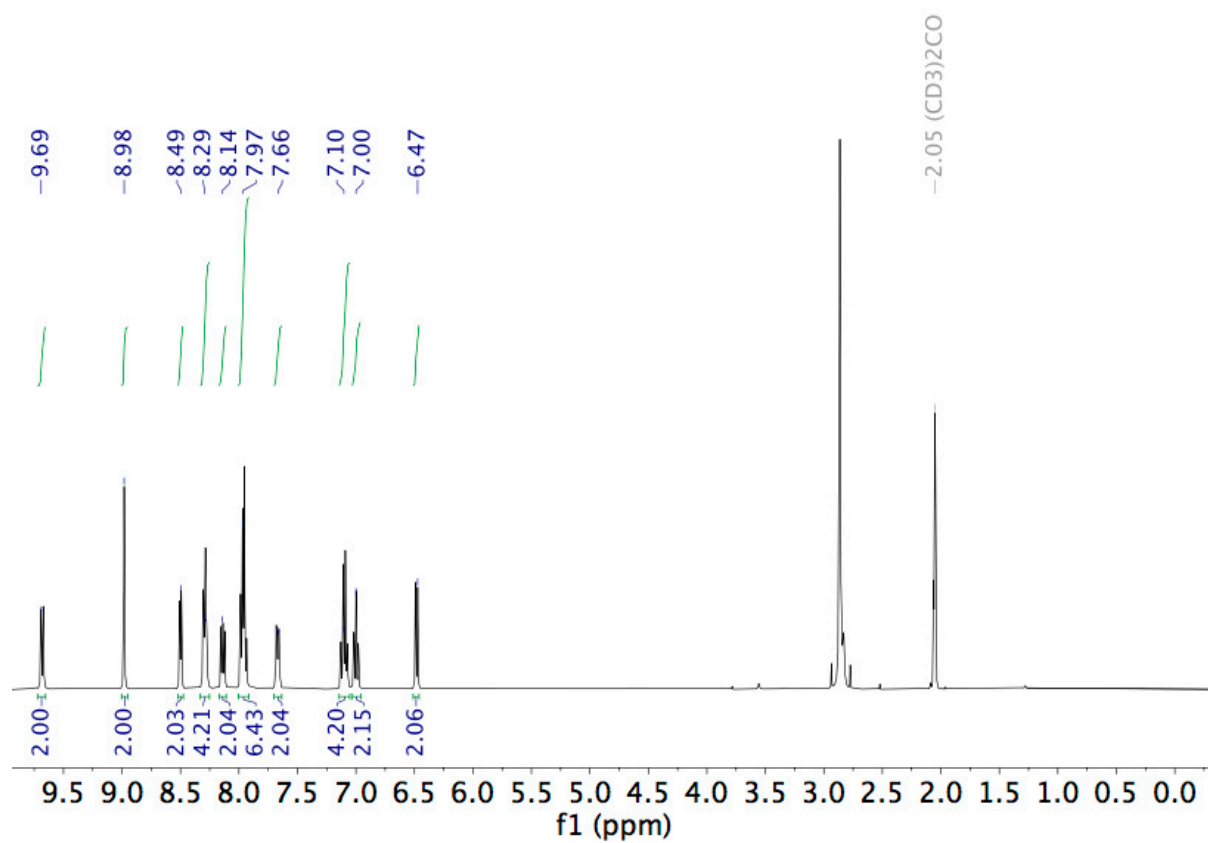

**Figure S3.**  $^1\text{H}$  NMR  $[\text{Ir}(\text{ppy})_2(\text{dppn})][\text{PF}_6]$  in  $(\text{CD}_3)_2\text{CO}$ .
